# Supplementary material for: Assessing temporal flux of plant hormones in stored processing potatoes using high definition accurate mass spectrometry
Source: PubMed Central journal article supplement — Hortic Res. 2015 Feb 25;2:15002–. doi: 10.1038/hortres.2015.2 (PMC4595984; doi:10.1038/hortres.2015.2), 2015-02-25

# Supplemental Information S1: Product ion spectra of plant hormones standards and internal standards (deuterated compounds).

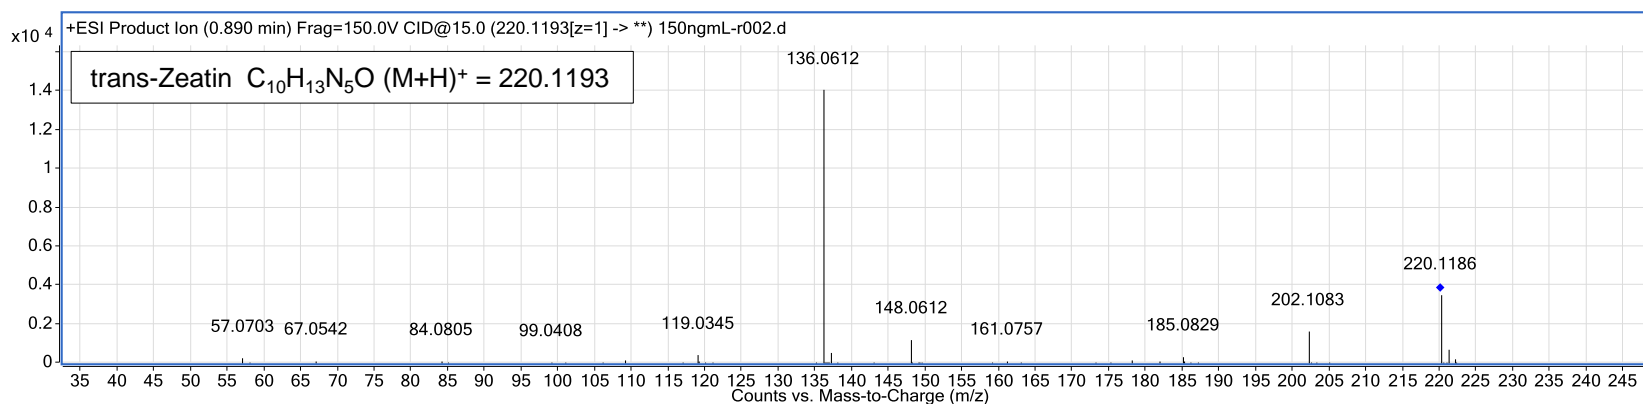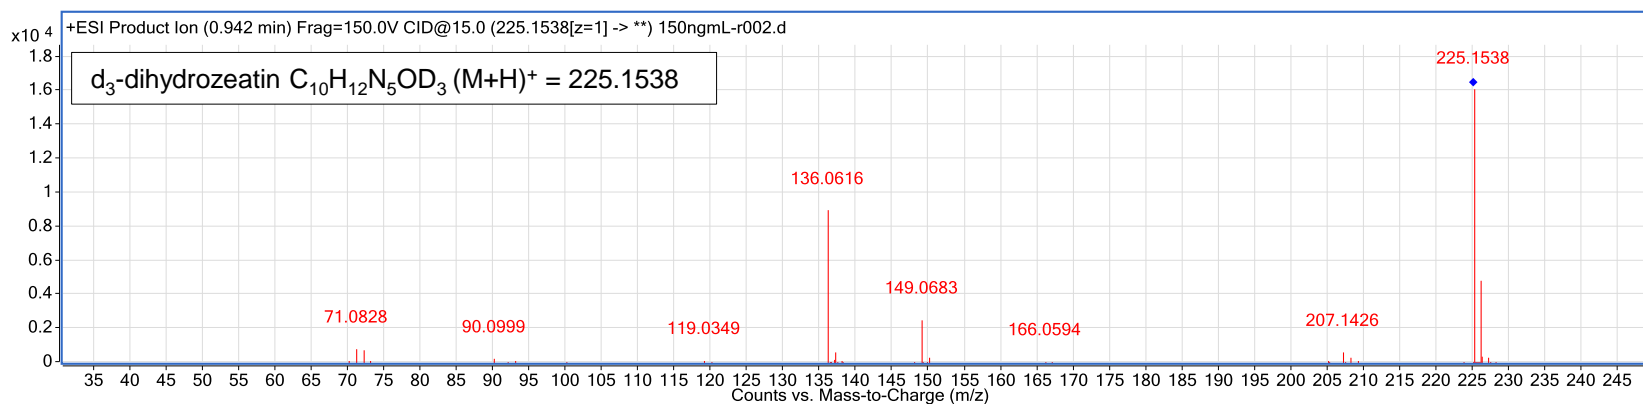

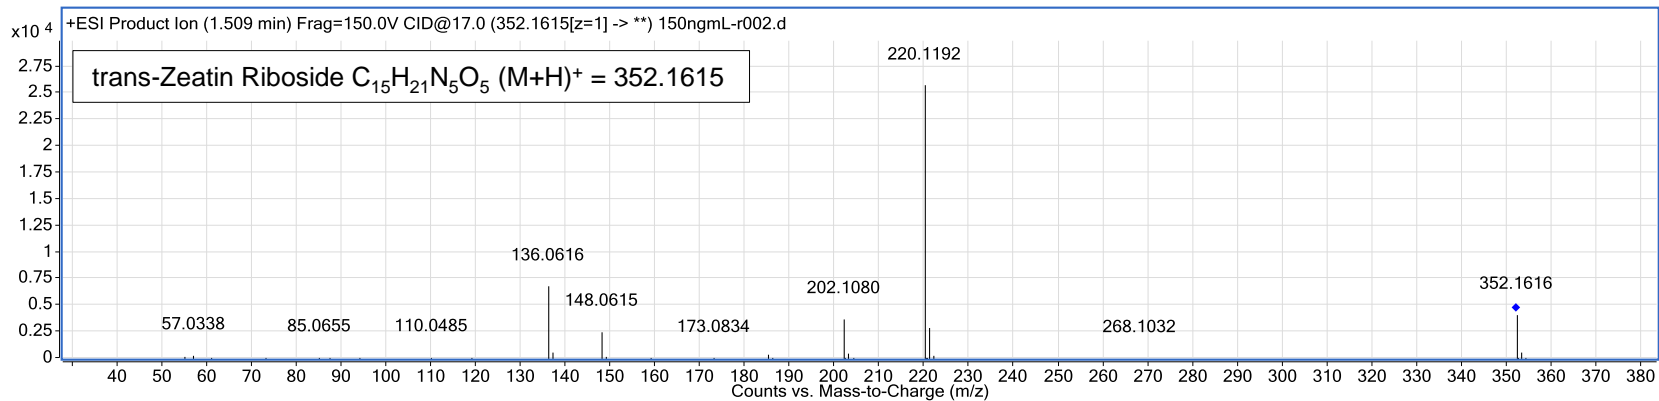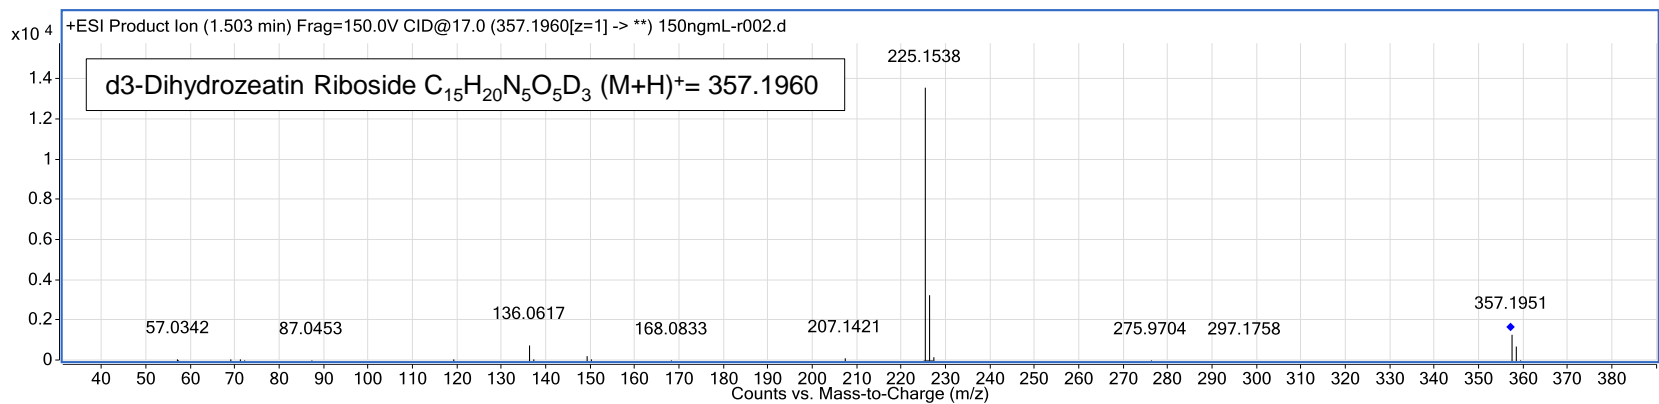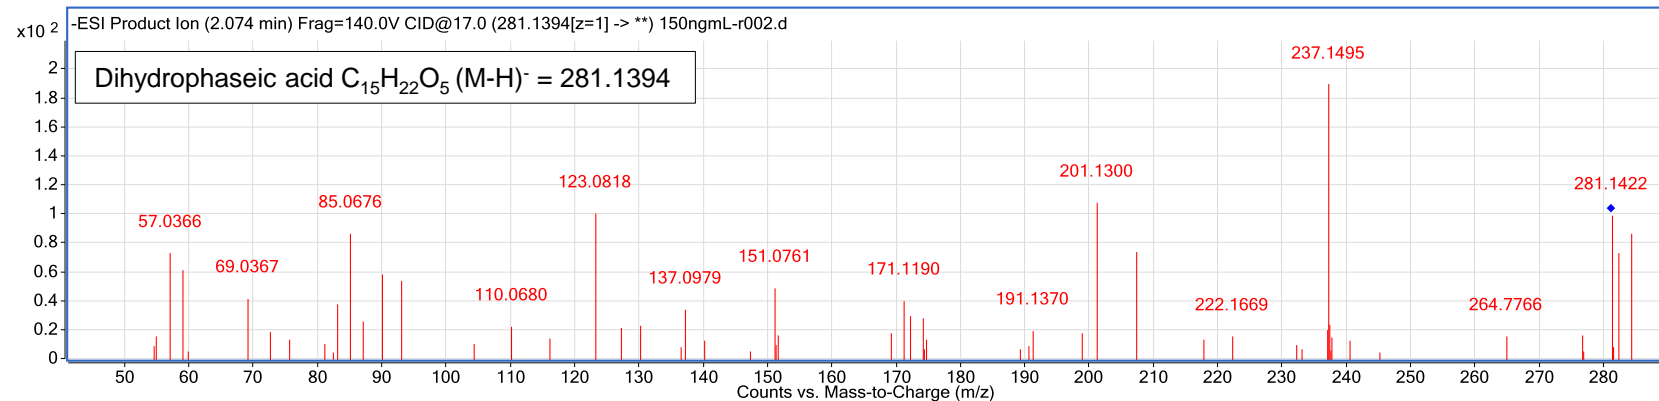

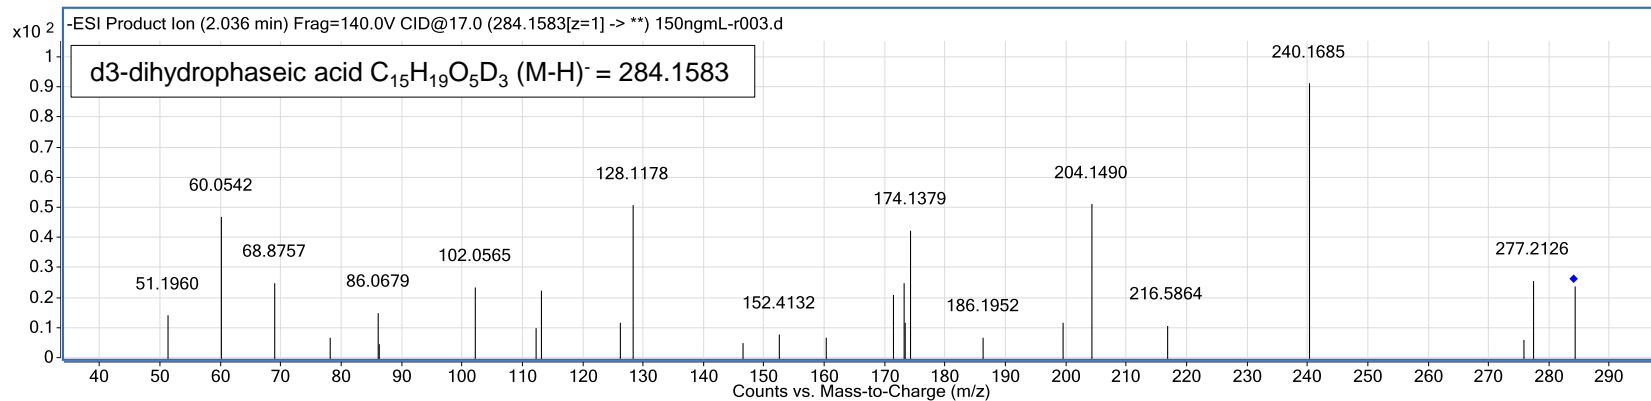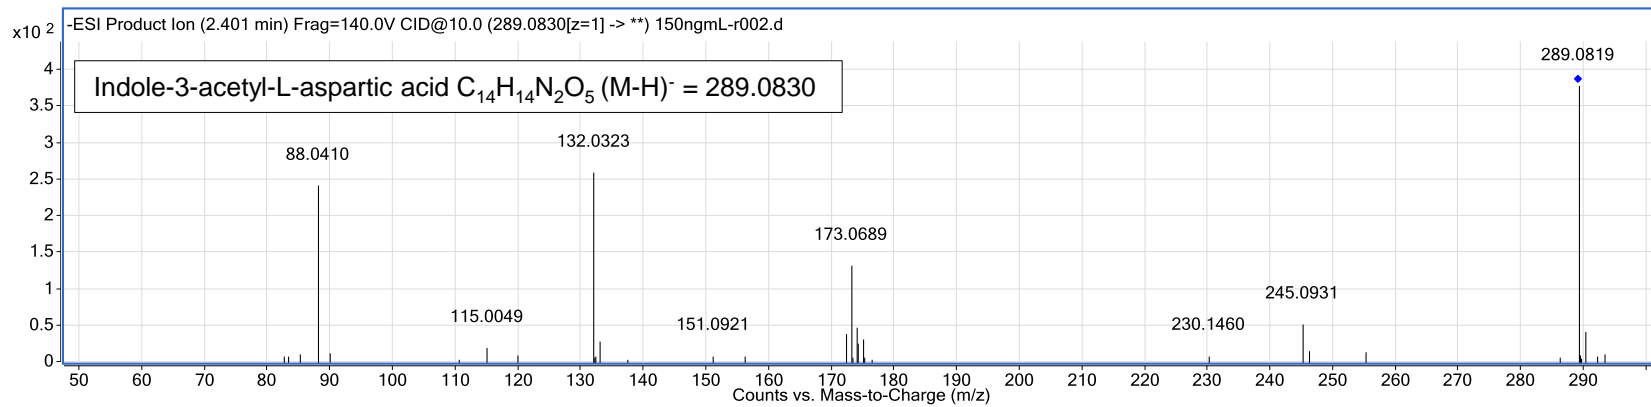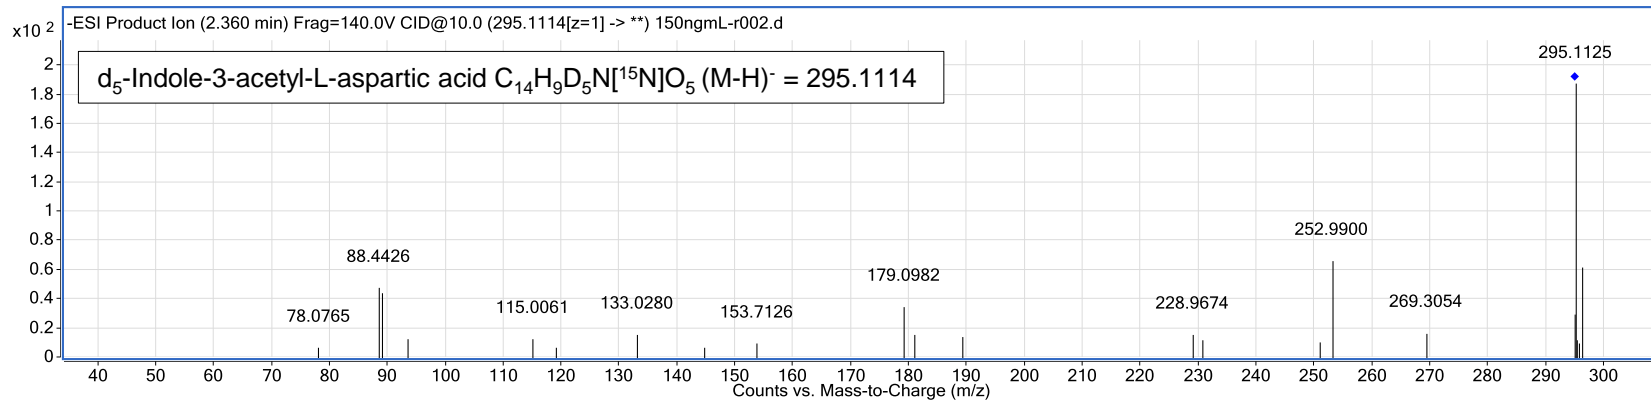

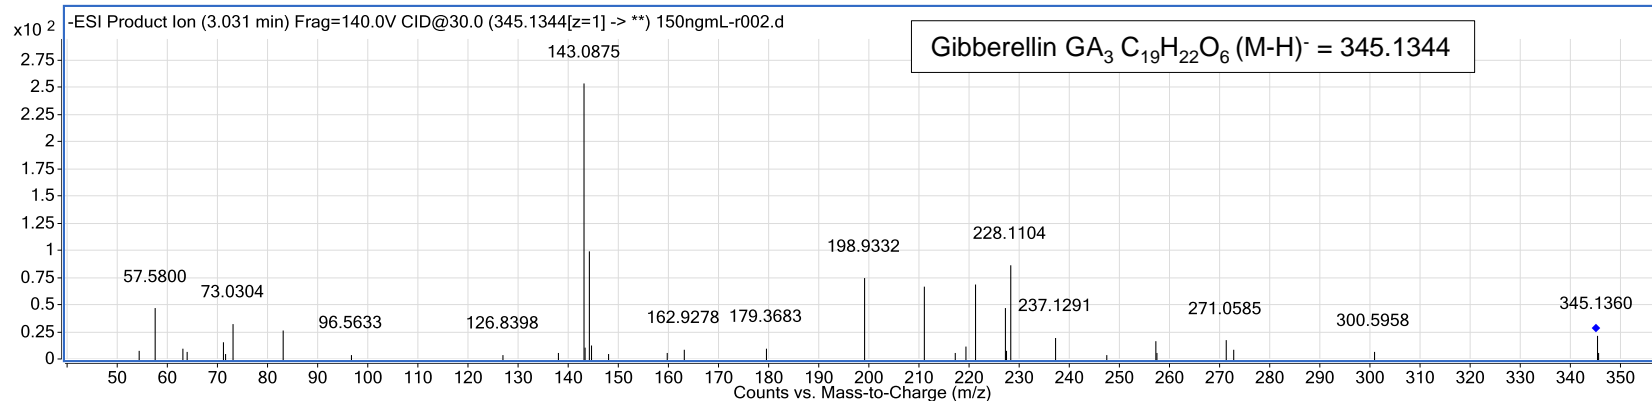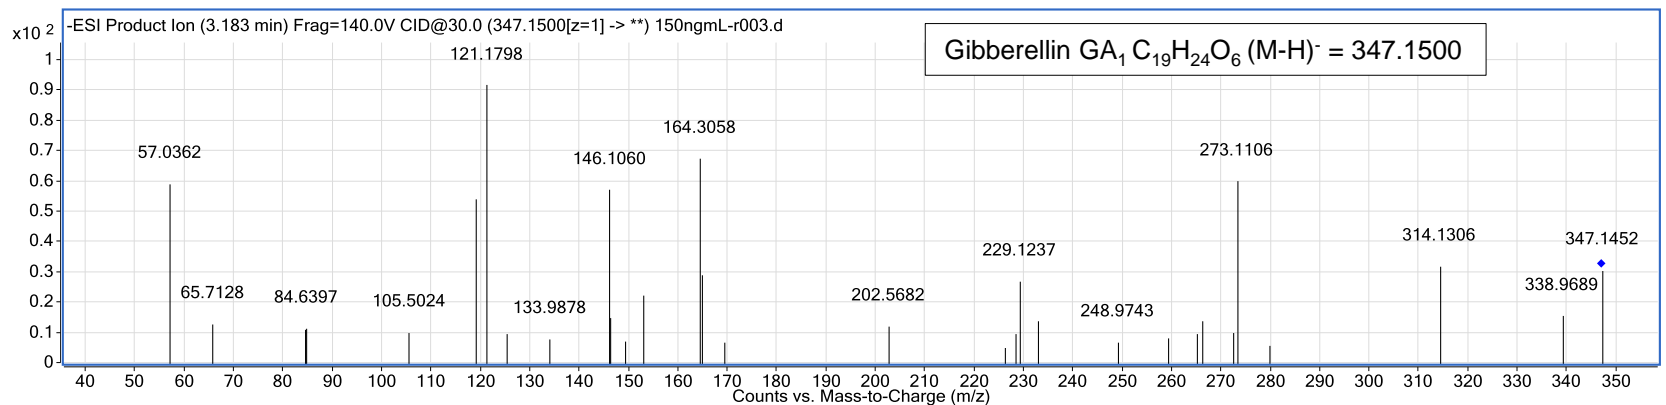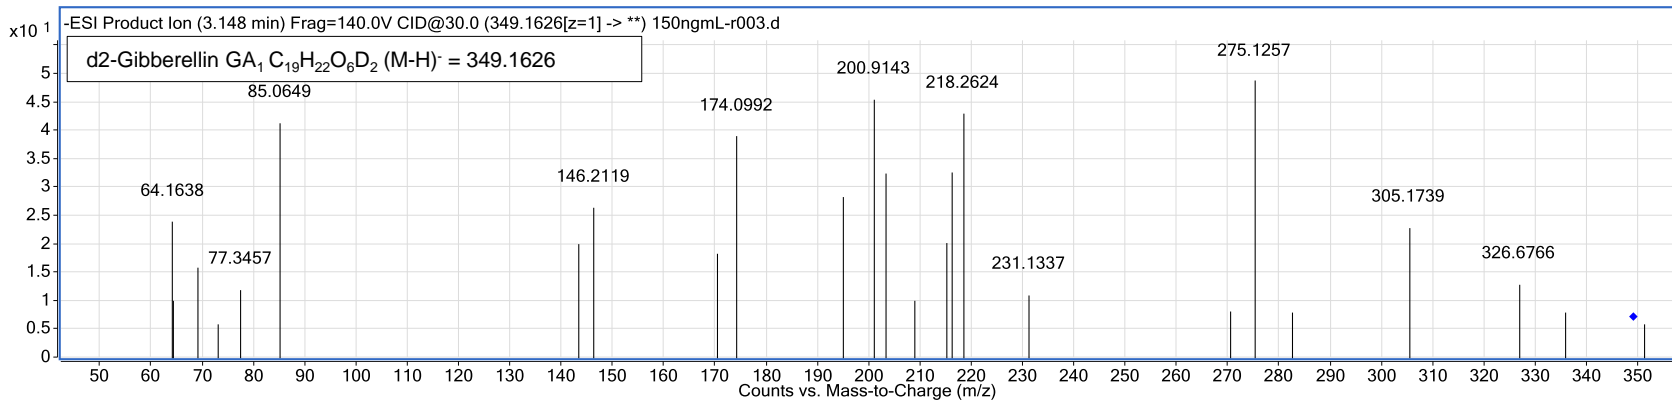

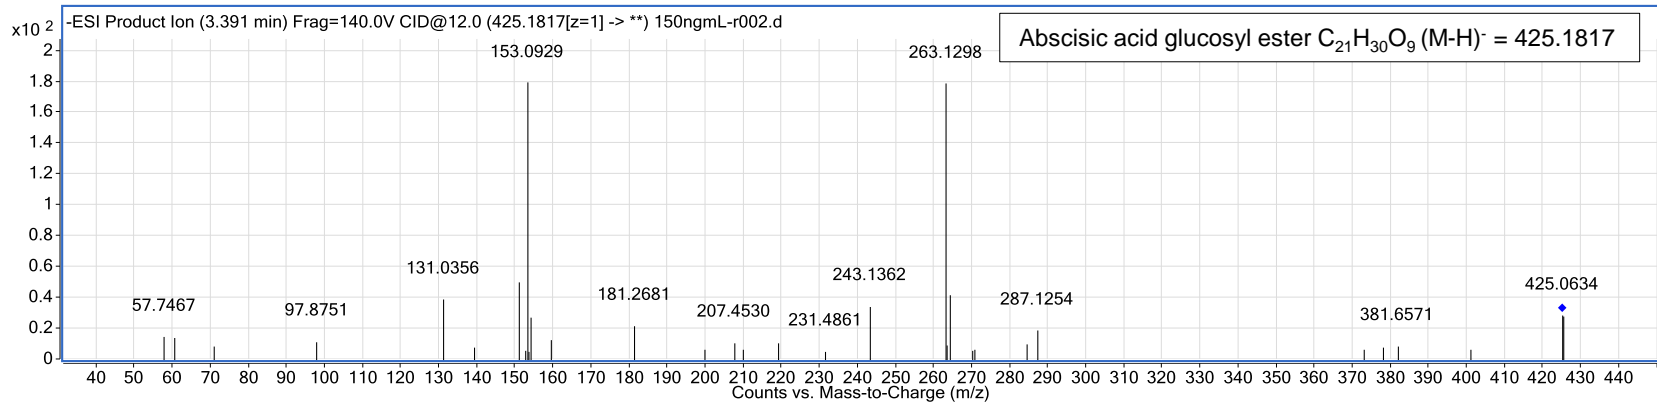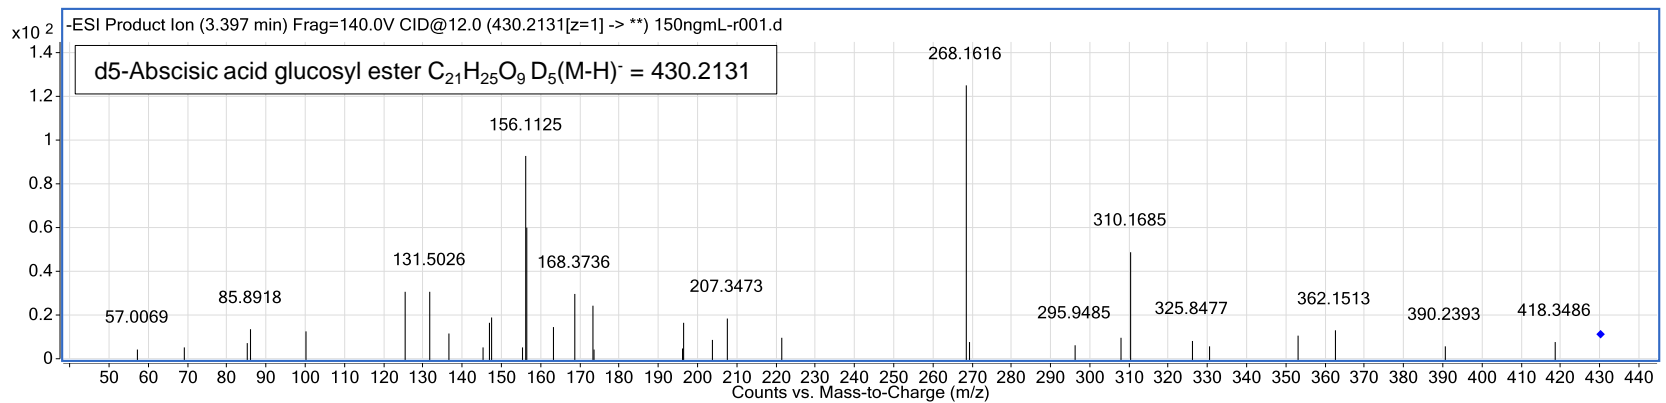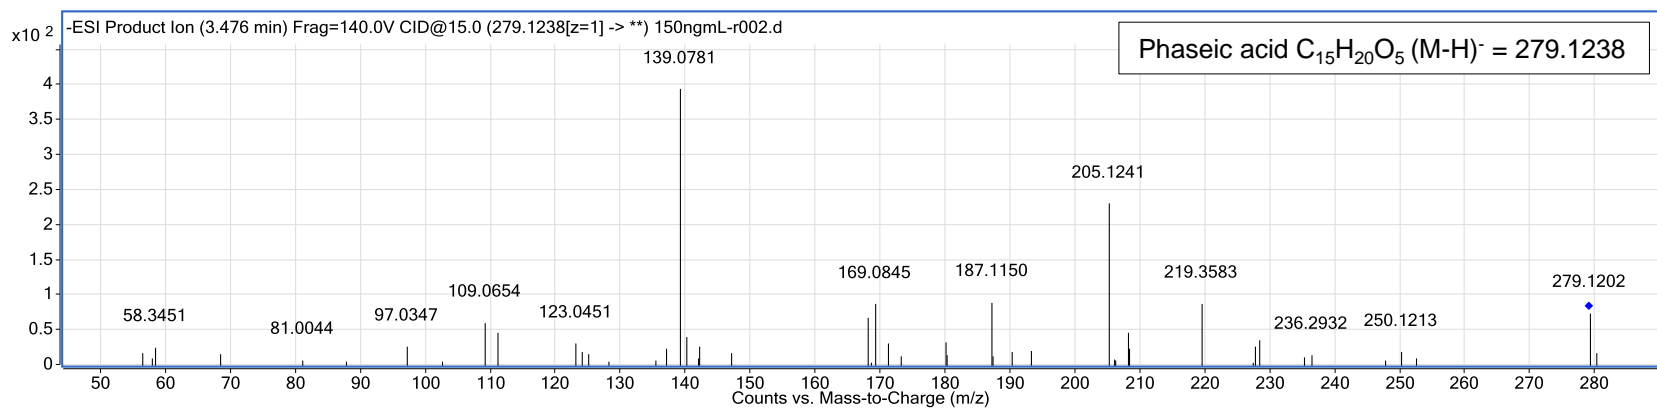

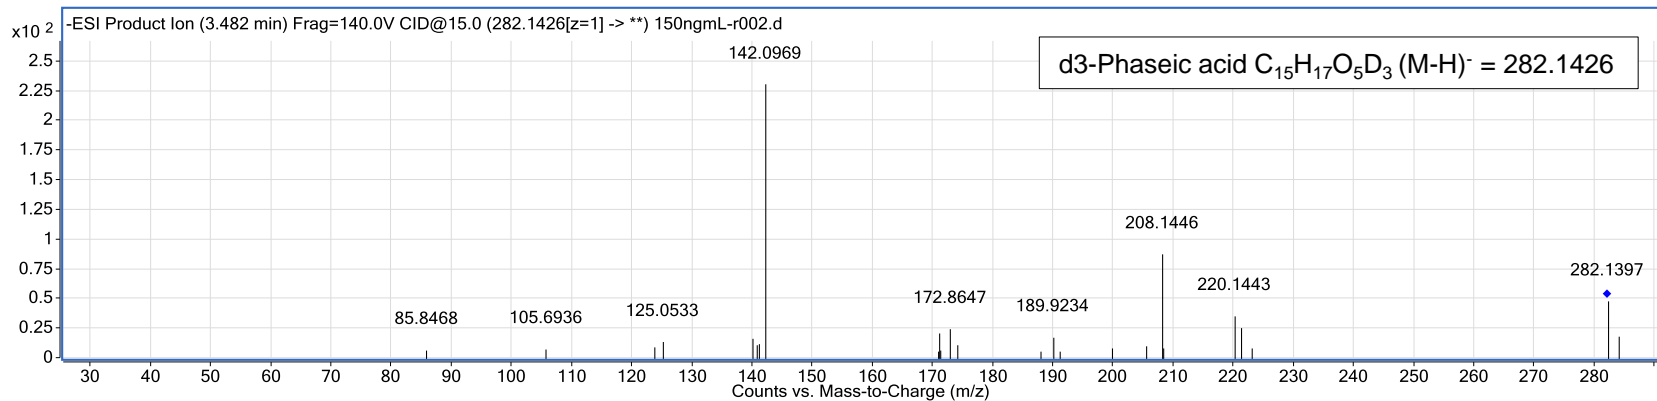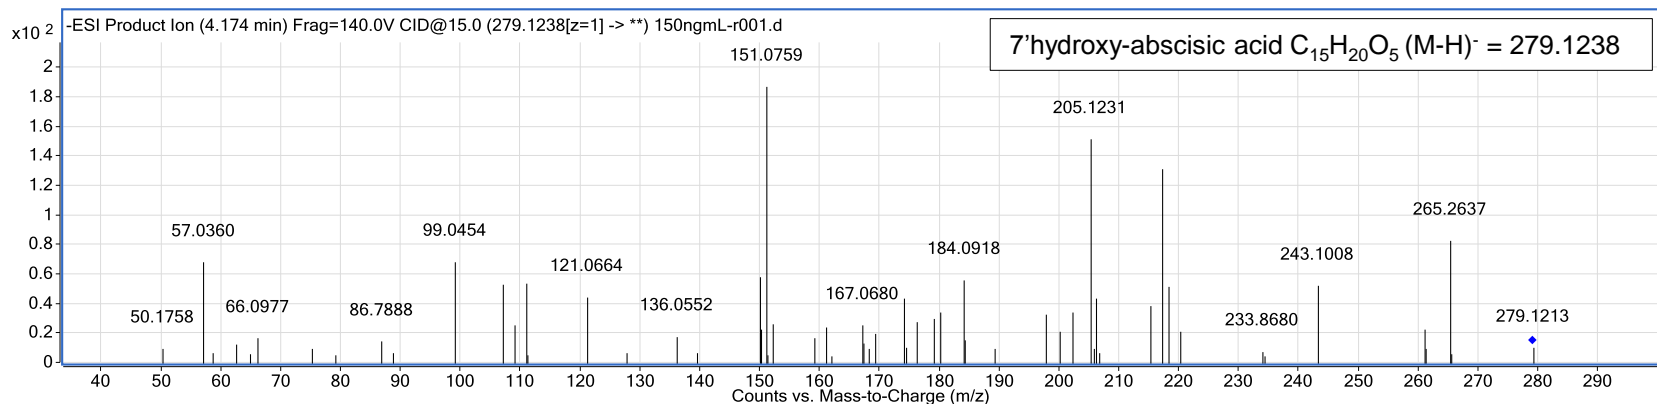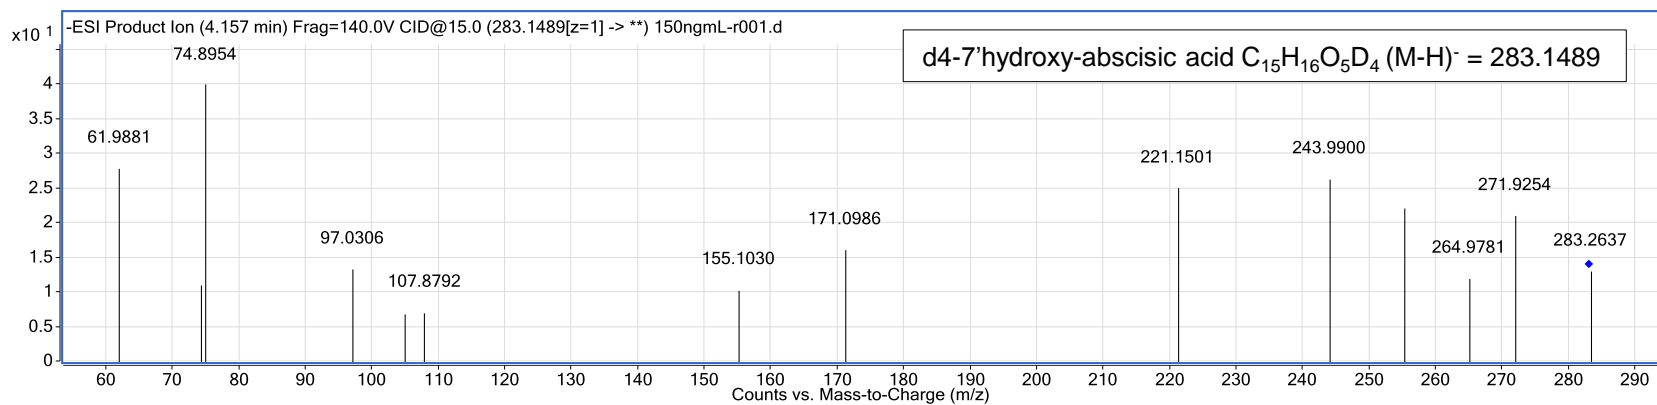

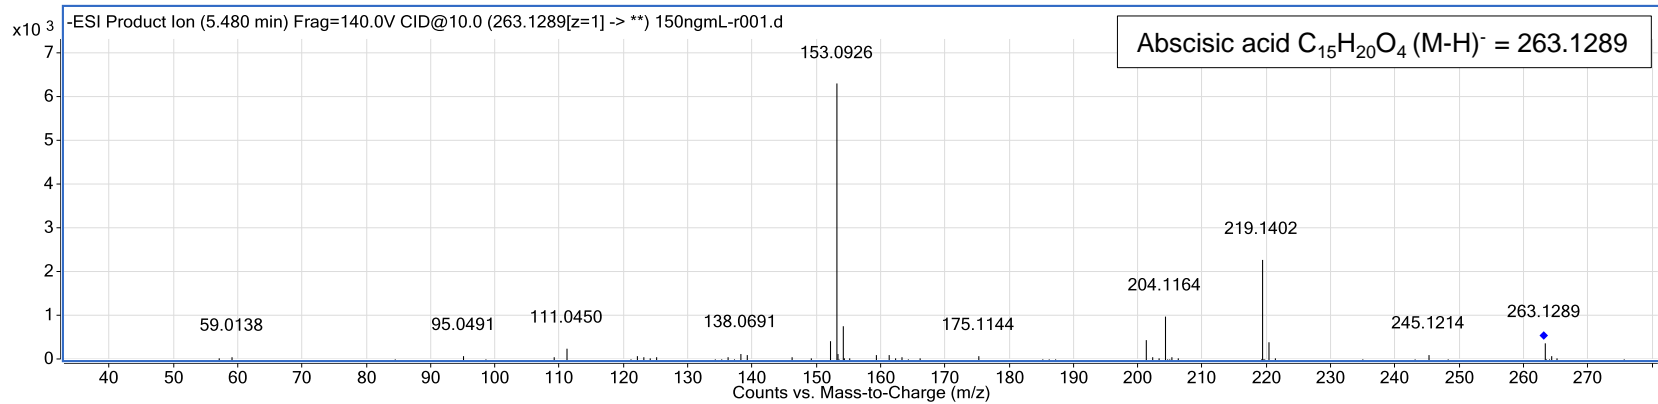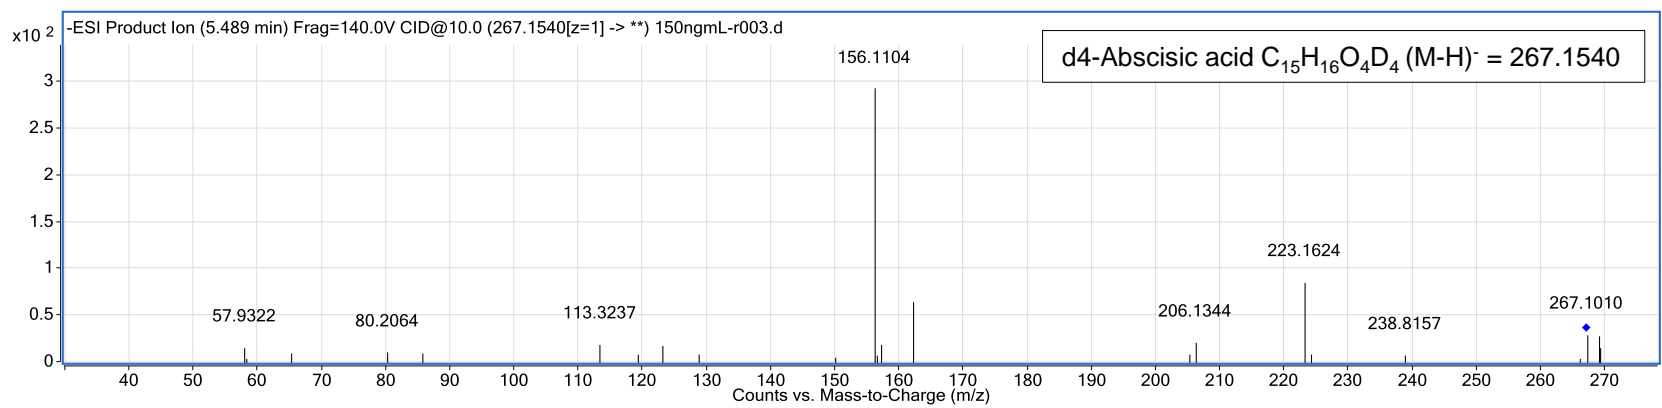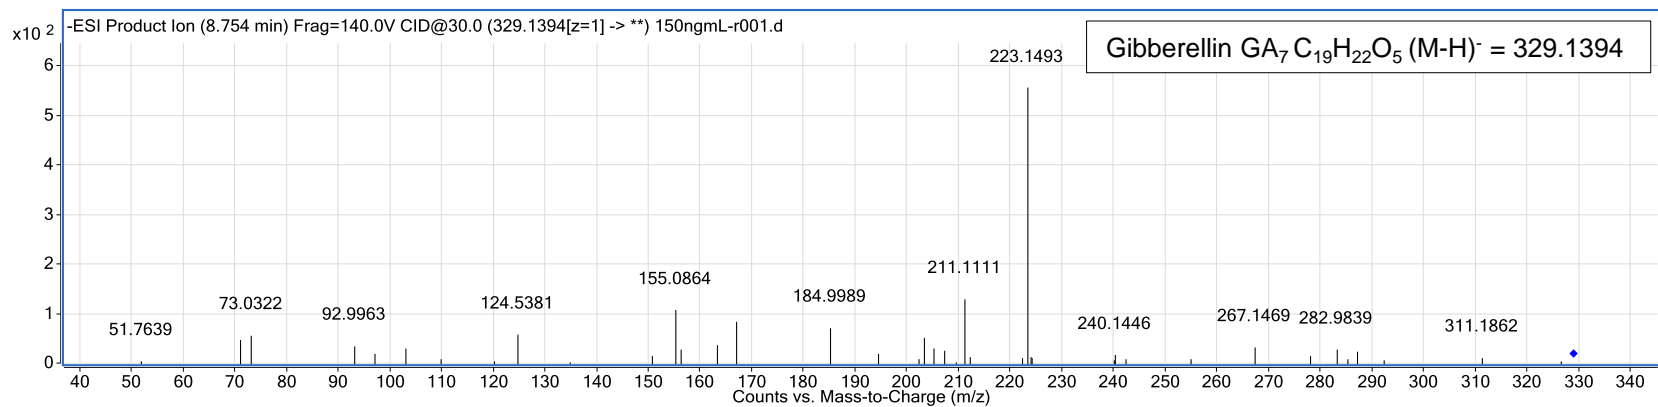

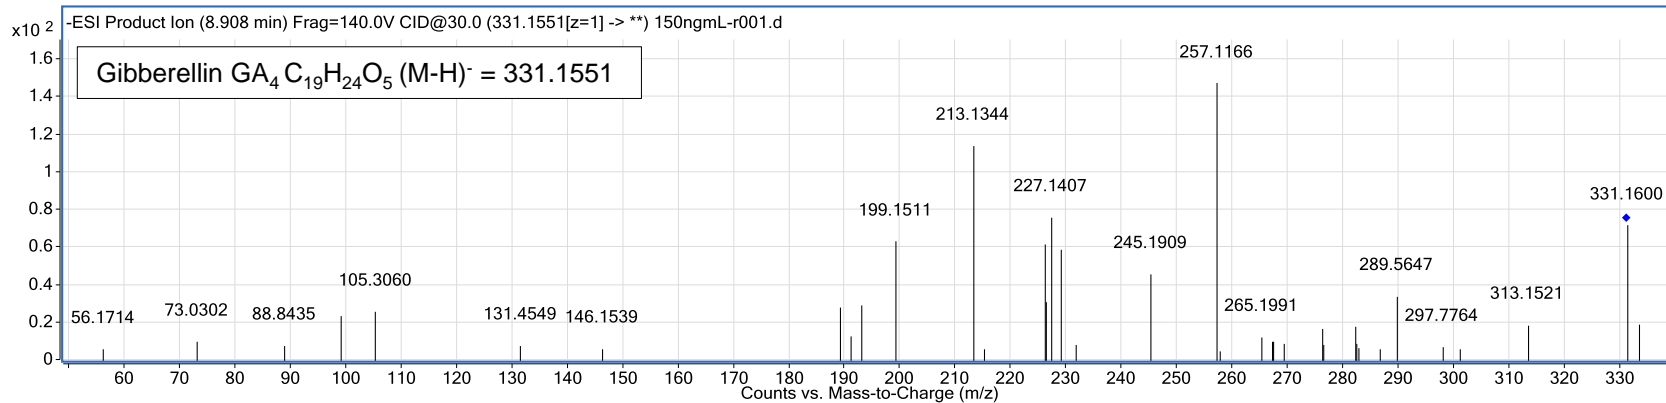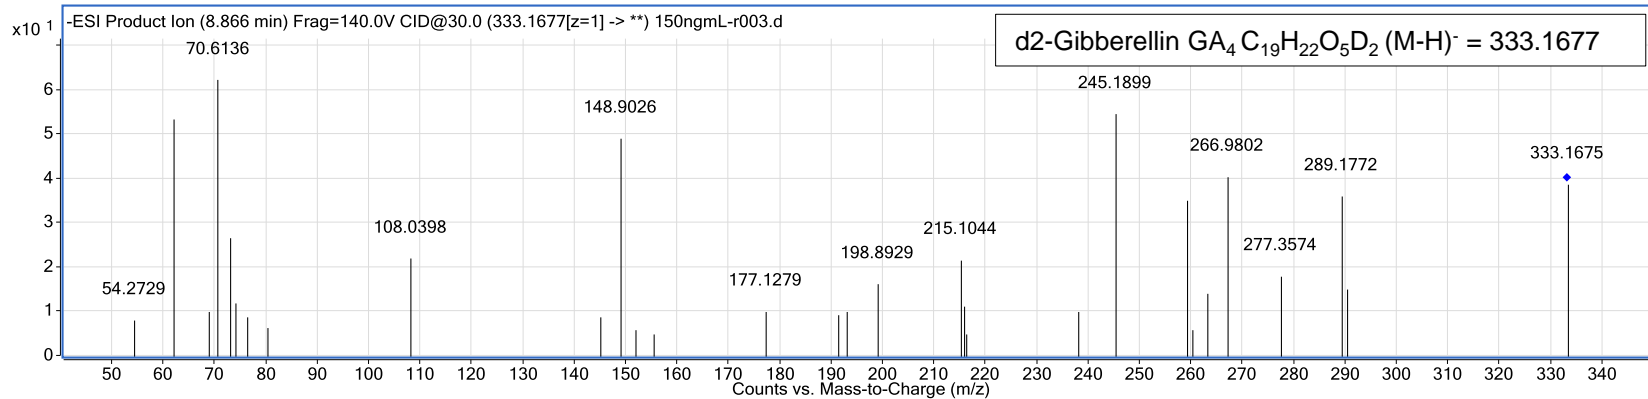

Supplement: hortres20152-s1.pdf [file hortres20152-s1.pdf]
