# Supplementary material for: Assessing temporal flux of plant hormones in stored processing potatoes using high definition accurate mass spectrometry
Source: PubMed Central journal article supplement — Hortic Res. 2015 Feb 25;2:15002–. doi: 10.1038/hortres.2015.2 (PMC4595984; doi:10.1038/hortres.2015.2), 2015-02-25
Supplement: hortres20152-s2.pdf [file hortres20152-s2.pdf]

**Supplemental Information S2: Intra and inter-day precision of the UHPLC-Q-TOF MS Method.**

| Plant<br>Hormone:                             | Concentration 5 ng mL <sup>-1</sup> |       |       | Concentration 25 ng mL <sup>-1</sup> |       |      | Concentration 50 ng mL <sup>-1</sup> |       |      |
|-----------------------------------------------|-------------------------------------|-------|-------|--------------------------------------|-------|------|--------------------------------------|-------|------|
|                                               | Average                             | StDev | RSD   | Average                              | StDev | RSD  | Average                              | StDev | RSD  |
| Intra-day precision, average of 3 repetitions |                                     |       |       |                                      |       |      |                                      |       |      |
| Z                                             | 3.44                                | 0.32  | 9.25  | 26.32                                | 0.99  | 3.77 | 51.85                                | 0.41  | 0.79 |
| ZR                                            | 3.62                                | 0.08  | 2.09  | 25.42                                | 0.14  | 0.55 | 52.52                                | 1.26  | 2.39 |
| DPA                                           | 4.31                                | 0.44  | 10.32 | 25.88                                | 0.39  | 1.52 | 50.11                                | 0.89  | 1.77 |
| IAAsp                                         | 4.31                                | 0.17  | 3.84  | 25.92                                | 0.92  | 3.55 | 51.01                                | 1.72  | 3.38 |
| GA3                                           | 4.70                                | 0.23  | 4.80  | 24.27                                | 0.91  | 3.74 | 50.87                                | 1.55  | 3.05 |
| GA1                                           | 4.74                                | 0.26  | 5.48  | 24.47                                | 1.18  | 4.83 | 50.91                                | 0.89  | 1.75 |
| ABAGE                                         | 4.88                                | 0.33  | 6.78  | 25.29                                | 1.21  | 4.77 | 50.55                                | 0.89  | 1.76 |
| PA                                            | 4.37                                | 0.25  | 5.70  | 25.62                                | 0.83  | 3.26 | 50.81                                | 0.15  | 0.30 |
| 7OHABA                                        | 5.55                                | 0.14  | 2.50  | 24.29                                | 0.06  | 0.26 | 50.28                                | 1.38  | 2.75 |
| ABA                                           | 5.42                                | 0.02  | 0.42  | 24.05                                | 0.31  | 1.28 | 49.35                                | 0.73  | 1.48 |
| GA7                                           | 4.85                                | 0.45  | 9.32  | 25.15                                | 0.67  | 2.66 | 50.14                                | 0.71  | 1.42 |
| GA4                                           | 4.97                                | 0.17  | 3.49  | 25.10                                | 0.69  | 2.74 | 49.86                                | 0.34  | 0.68 |

Inter-day precision average of 4 consecutive days 3 repetitions per day.

|        |      |      |      |       |      |      |       |      |      |
|--------|------|------|------|-------|------|------|-------|------|------|
| Z      | 3.93 | 0.19 | 4.98 | 25.60 | 0.43 | 1.68 | 51.16 | 0.40 | 0.78 |
| ZR     | 4.02 | 0.16 | 3.85 | 25.52 | 0.26 | 1.02 | 51.38 | 0.46 | 0.89 |
| DPA    | 5.19 | 0.29 | 5.74 | 25.13 | 0.44 | 1.77 | 49.76 | 0.70 | 1.41 |
| IAAsp  | 4.66 | 0.29 | 6.17 | 25.20 | 0.40 | 1.58 | 50.71 | 0.95 | 1.87 |
| GA3    | 4.48 | 0.11 | 2.51 | 25.09 | 0.73 | 2.91 | 50.67 | 1.01 | 1.99 |
| GA1    | 4.22 | 0.26 | 6.45 | 25.26 | 0.71 | 2.80 | 50.88 | 1.15 | 2.26 |
| ABAGE  | 5.17 | 0.28 | 5.52 | 25.06 | 0.70 | 2.76 | 50.01 | 0.74 | 1.49 |
| PA     | 4.48 | 0.26 | 5.83 | 25.40 | 0.60 | 2.36 | 50.79 | 0.44 | 0.88 |
| 7OHABA | 5.15 | 0.18 | 3.48 | 24.97 | 0.57 | 2.24 | 50.03 | 1.02 | 2.05 |
| ABA    | 5.05 | 0.13 | 2.68 | 24.70 | 0.41 | 1.64 | 50.03 | 0.71 | 1.43 |
| GA7    | 4.75 | 0.41 | 8.54 | 24.97 | 0.60 | 2.40 | 50.34 | 0.77 | 1.53 |
| GA4    | 4.88 | 0.15 | 3.06 | 25.10 | 0.64 | 2.56 | 50.41 | 0.45 | 0.89 |

StDev Standard Deviation, RSD Relative Standard Deviation.
